# Supplementary material for: The differences in immunoadjuvant mechanisms of TLR3 and TLR4 agonists on the level of antigen-presenting cells during immunization with recombinant adenovirus vector
Source: Springer Nature journal article supplement (doi:10.1186/s12865-018-0264-x), 2018-07-28
Supplement: MOESM1 [file 15984786]

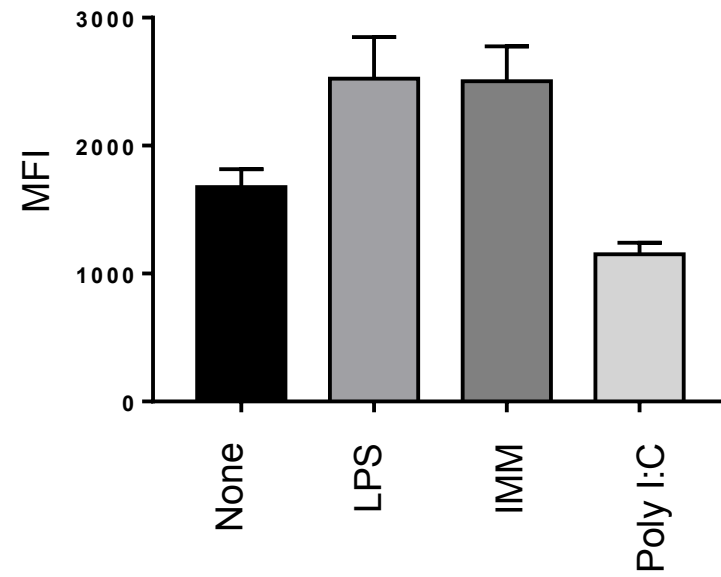

**Figure S1.** Effect of TLR agonists on the expression of rAd in DCs.

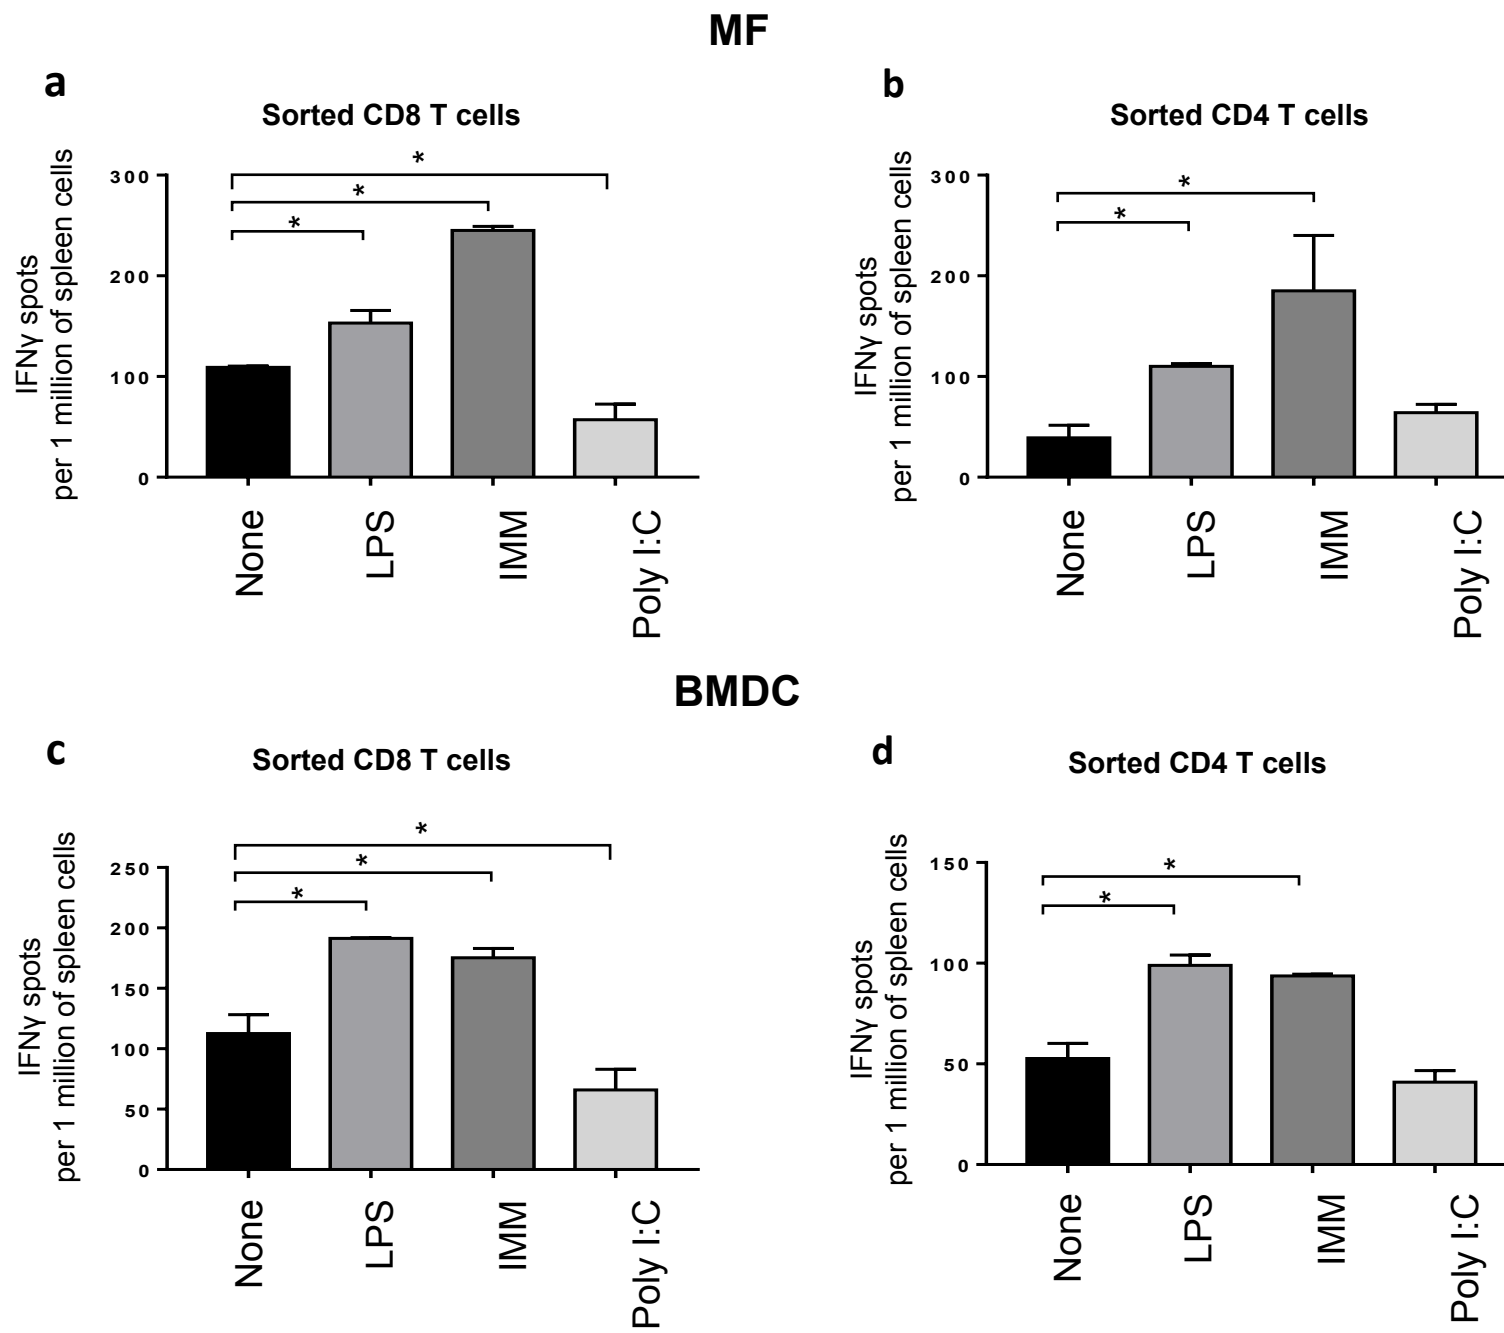

**Figure S2.** Effect of TLR3- and TLR4-activated APCs on the reactivation of CD4<sup>+</sup> and CD8<sup>+</sup> T-cells.
